# Supplementary material for: A universal strategy for the incorporation of internal standards into SERS substrates to improve the reproducibility of Raman signals
Source: Royal Society of Chemistry journal article supplement (doi:10.1039/d1an01562a), 2021-01-01
Supplement: d1an01562a1.pdf [file d1an01562a1.pdf]

## **Supporting Information**

### **A universal strategy for the incorporation of internal standards into SERS substrate to improve the reproducibility of Raman signal**

Bingyong Lin,<sup>a,b</sup> Yuanyuan Yao,<sup>a\*</sup> Yueliang Wang,<sup>a</sup> Palanisamy Kannan,<sup>a\*</sup> Lifeng Chen,<sup>a</sup> and  
Longhua Guo<sup>a, b\*</sup>

<sup>a</sup> College of Biological, Chemical Sciences and Engineering, Jiaying University, Jiaying 314001, PR  
China

<sup>b</sup> Institute of Nanomedicine and Nanobiosensing; MOE Key laboratory for analytical science of food  
safety and biology; Fujian Provincial Key Laboratory of Analysis and Detection Technology for  
Food Safety; College of Chemistry, Fuzhou University, Fuzhou, 350116, PR China

\* Corresponding Authors E-mail: yaoyy@zjxu.edu.cn; [ktpkannan@mail.zjxu.edu.cn](mailto:ktpkannan@mail.zjxu.edu.cn) (P Kannan);  
[guolh@fzu.edu.cn](mailto:guolh@fzu.edu.cn) (L Guo). Tel: +86 59122866141, Fax: +86 59122866135.

## Scheme S1

**Scheme S1. Impact of the Charge and Sulfhydryl on the Surface Competitive Adsorption of Au NBPs.** (A) and (C) are the schematic diagram of opposite charge between internal standard and the analyte, (B) is the same charge between internal standard and the analyte; (A) and (B) are the schematic diagram of internal standard with sulfhydryl group, (C) is the schematic diagram of internal standard without sulfhydryl group.

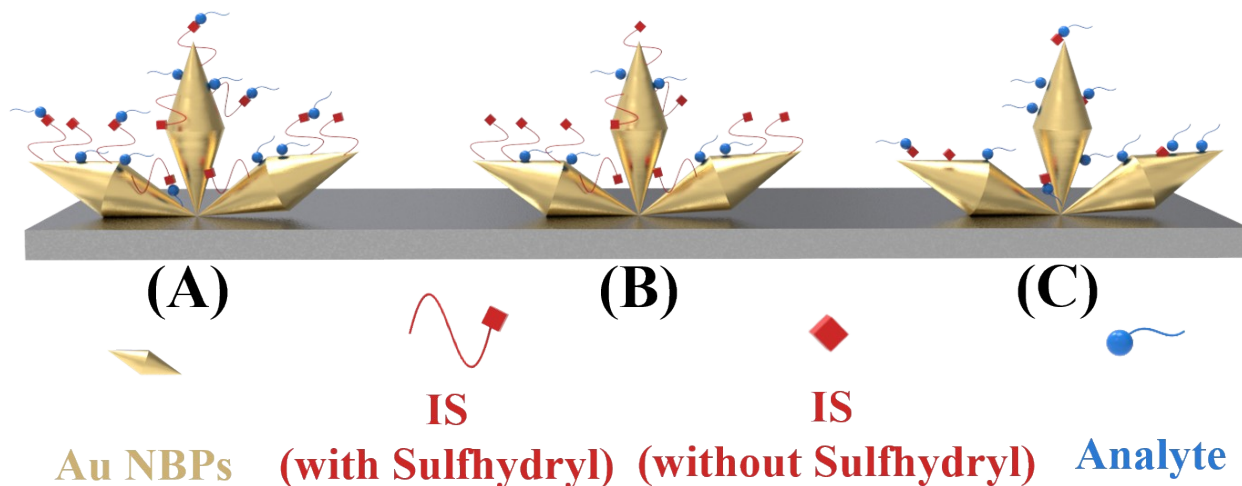

**Figure S1**

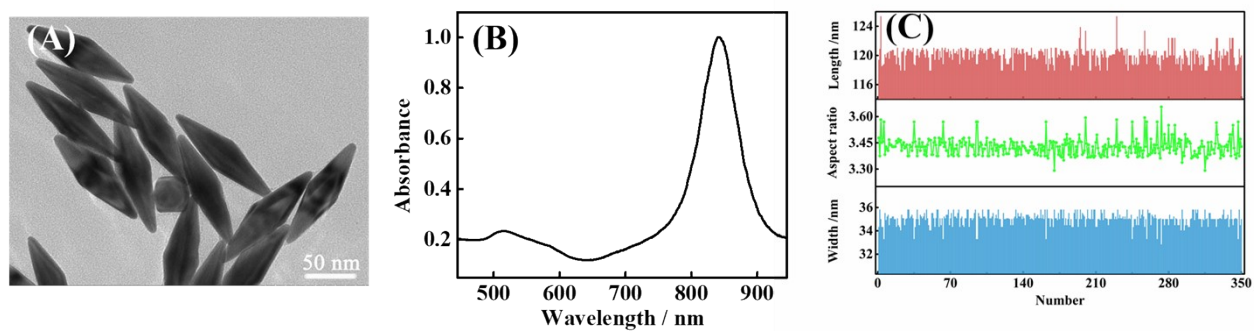

**Figure S1.** (A) The TEM image of Au NBPs. (B) UV-vis spectra of Au NBPs, the longitudinal and transverse LSPR peaks of the Au NBPs were located at  $\sim 840$  nm and  $\sim 520$  nm, respectively. (C) The histogram of the length and width of 350 Au NBPs and the line chart of corresponding aspect ratio.

**Figure S2**

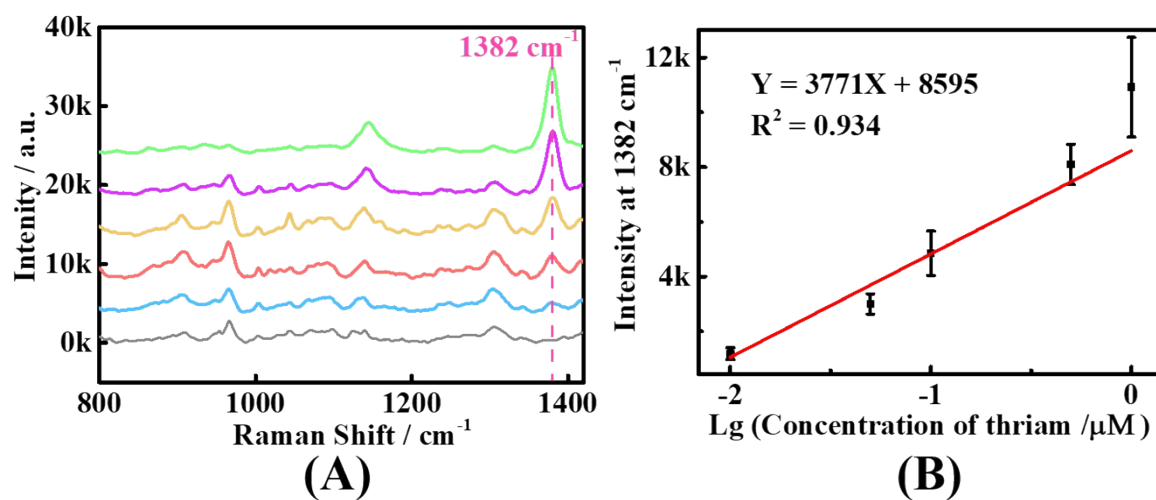

**Figure S2.** (A) Raman spectra obtained for the detection of thiram at different concentrations by using Au NBPs/AAO SERS substrate. (B) Corresponding linear fitting of the SERS intensity at 1382 cm<sup>-1</sup> under various thiram concentrations.
